# Supplementary material
Source: PubMed Central journal article supplement (PMC7099144)
Supplement: JB.00697-19-s0001.pdf [file JB.00697-19-s0001.pdf]

# SUPPLEMENTAL MATERIAL

## ***Bacillus subtilis* Fur is a transcriptional activator for the PerR-repressed *pfeT* gene encoding an iron efflux pump**

Azul Pinochet-Barros & John D. Helmann\*

Department of Microbiology, Cornell University, 370 Wing Hall, 123 Wing Drive, Ithaca, New York 14853-8101, USA.

\*Correspondence email: [jd9@cornell.edu](mailto:jd9@cornell.edu)

Table S1) Strains and plasmids used in this study.

Table S2) Oligonucleotides used in this study.

Table S3) List of Fur operator sites used to generate logo sequences.

Table S4) List of PerR operator sites used to generate logo sequences.

Figure S1) Full promoter sequences of *pfeT* and *frvA*.

Figure S2) Protein sequence alignment between PfeT and FrvA.

# Table S1)

| STRAIN                               | GENOTYPE                                                                                 | REFERENCE        |
|--------------------------------------|------------------------------------------------------------------------------------------|------------------|
| <b><i>B. subtilis</i></b>            |                                                                                          |                  |
| CU1065                               | W168 attSPβ trpC2                                                                        | Laboratory stock |
| ZB307A                               | W168 SPβ c2Δ2::Tn917::pSK10Δ6                                                            | Laboratory stock |
| HB18022                              | CU1065 SPβ c2Δ2::Tn917::φ(pfeT-cat-lacZ)                                                 | This work        |
| HB2118                               | CU1065 perR::kan SPβ c2Δ2::Tn917::φ(pfeT-cat-lacZ)                                       | (1)              |
| HB2111                               | CU1065 fur::kan SPβ c2Δ2::Tn917::φ(pfeT-cat-lacZ)                                        | (1)              |
| HB2139                               | CU1065 perR::spc fur::kan SPβ c2Δ2::Tn917::φ(pfeT-cat-lacZ)                              | (2)              |
| HB8116                               | CU1065 pfeT::kan SPβ c2Δ2::Tn917::φ(pfeT-cat-lacZ)                                       | Laboratory stock |
| HB18068                              | CU1065 SPβ c2Δ2::Tn917::φ(PI*pfeT-cat-lacZ)                                              | This work        |
| HB18075                              | CU1065 SPβ c2Δ2::Tn917::φ(FII*pfeT-cat-lacZ)                                             | This work        |
| HB18076                              | CU1065 SPβ c2Δ2::Tn917::φ(FIII*pfeT-cat-lacZ)                                            | This work        |
| HB18074                              | CU1065 SPβ c2Δ2::Tn917::φ(FF**pfeT-cat-lacZ)                                             | This work        |
| HB18127                              | CU1065 SPβ c2Δ2::Tn917::φ(FII*PI*pfeT-cat-lacZ)                                          | This work        |
| HB18125                              | CU1065 SPβ c2Δ2::Tn917::φ(FIII*PI*pfeT-cat-lacZ)                                         | This work        |
| HB18126                              | CU1065 SPβ c2Δ2::Tn917::φ(3*pfeT-cat-lacZ)                                               | This work        |
| HB18228                              | CU1065 Δkata, ahpCF::kan                                                                 | This work        |
| HB18220                              | CU1065 Δkata, ahpCF::kan SPβ c2Δ2::Tn917::φ(pfeT-cat-lacZ)                               | This work        |
| HB18221                              | CU1065 Δkata, ahpCF::kan SPβ c2Δ2::Tn917::φ(PI*pfeT-cat-lacZ)                            | This work        |
| HB18222                              | CU1065 Δkata, ahpCF::kan SPβ c2Δ2::Tn917::φ(FII*pfeT-cat-lacZ)                           | This work        |
| HB18223                              | CU1065 Δkata, ahpCF::kan SPβ c2Δ2::Tn917::φ(FIII*pfeT-cat-lacZ)                          | This work        |
| HB18224                              | CU1065 Δkata, ahpCF::kan SPβ c2Δ2::Tn917::φ(FF**pfeT-cat-lacZ)                           | This work        |
| HB18225                              | CU1065 Δkata, ahpCF::kan SPβ c2Δ2::Tn917::φ(FII*PI*pfeT-cat-lacZ)                        | This work        |
| HB18226                              | CU1065 Δkata, ahpCF::kan SPβ c2Δ2::Tn917::φ(FIII*PI*pfeT-cat-lacZ)                       | This work        |
| HB18227                              | CU1065 Δkata, ahpCF::kan SPβ c2Δ2::Tn917::φ(3*pfeT-cat-lacZ)                             | This work        |
| <b><i>E. coli</i></b>                |                                                                                          |                  |
| DH5α                                 | φ80lacZΔM15 recA1 endA1 gyrA96 thi-1 hsdR17(rK- mK+)supE44 relA1 deoR Δ(lacZYA-argF)U169 | Laboratory stock |
| <b>PLASMID DESCRIPTION REFERENCE</b> |                                                                                          |                  |
| pJPM122                              | cat-lacZ operon fusion vector for SPβ.                                                   | (3)              |
| pDR244                               | For removal of the erythromycin resistance cassette to generate in-frame deletions.      | (4)              |
| pET17b                               | Used as template for the IVT ladder.                                                     | Laboratory stock |

**Table S2)**

| <b>NUMBER</b> | <b>NAME</b>     | <b>SEQUENCE</b>                                          |
|---------------|-----------------|----------------------------------------------------------|
| 6927          | IVT pfeT-F      | GCAAACAAGCTGACGTTTCCGATTGTCCTT                           |
| 6928          | IVT pfeT-R      | TTTCCCTCTTGCTGTGTTTTCAATGGCTCATG                         |
| 7115          | IVT frvA-F      | CAGTGGTTGGTACAATGAATCCAGGAAGAA                           |
| 7116          | IVT frvA-R      | CAACATCACTACCGACCAAACAGCCAAT                             |
| 9052          | IVT ladder F1   | GCCGCAGTGTTATCACTCATGGT                                  |
| 9053          | IVT ladder R1   | TGGTTGAGTACTCACCAGTCACAGAA                               |
| 9054          | IVT ladder R2   | AGCACTTTTAAAGTTCTGCTATGTGGCG                             |
| 9055          | IVT ladder R3   | TGCTGAAGATCAGTTGGGTGCAC                                  |
| 7277          | bgal-pfeT-F     | GCCAAGCTTCCCAACATCATTTTTGCTGAAT                          |
| 7278          | bgal-pfeT-R     | GCGGATCCGGGTCGCGTTGAACGATAA                              |
| 9002          | EMSA pfeT-F     | GCTGAGAGCATAGACTCTCAGCTTT                                |
| 7032          | pointPI-F       | TGATAATTATTATCAAAAAGAAATTAATTAATAATTAATTGAAATTCTCTTCGT   |
| 7174          | pointPI-R       | TTAATTATTAATTAATTTCTTTTTGATAATAATTATCATTAAATGTTTATTCCTTC |
| 7352          | pointFIII-F     | GTTTTTATAAGAGAAACTTAGTAGTAATAAGTTCTCAATTAGAGA            |
| 7353          | pointFIII-R     | CTTATTACTACTAAGTTTCTCTTATAAAAAC                          |
| 7440          | pointFII-F      | GAAGAAGTGAATAAACATTAACTTTATATTACAAAAAAGAAA               |
| 7351          | pointFII-R      | TTTTGTAATATAAAGTTAATGTTTATTCACCTCTTC                     |
| 9094          | katA check-F    | CACTTACTCTGCTTGTTTCGCAA                                  |
| 9093          | katA check-R    | GAACACCGAAGGCTCTTATCGTT                                  |
| 6326          | BKE MLS check R | TTTTCTCGTTCATAGTAGTTCCTCC                                |
| 535a          | pJPM122 check F | GTACATATTGTCGTTAGAACGCGGC                                |
| 366           | pJPM122 check R | ACTCTCCGTCGCTATTGTAACCAG                                 |

**Table S3)**

| <b>Fur regulated genes</b> | <b>OPERATOR SEQUENCE</b> |
|----------------------------|--------------------------|
| <i>dhbA</i>                | <b>TGATAATCATTATCA</b>   |
| <i>ykuN1</i>               | <b>TGAAAATCATTATCA</b>   |
| <i>ykuN2</i>               | <b>TGAAAATCATTATCA</b>   |
| <i>yuil (besA)</i>         | <b>TGAAAATCATTATCA</b>   |
| <i>feuABCybbA</i>          | <b>TGATAATAGTTATCA</b>   |
| <i>yxeB</i>                | <b>TGATAATGATAATCA</b>   |
| <i>ydbN</i>                | <b>TGATTATCAATATCG</b>   |
| <i>yfiY</i>                | <b>TGATAATGAATTTCa</b>   |
| <i>ybbB (btr)</i>          | <b>TGAAAATGATTATCA</b>   |
| <i>fhuB/D</i>              | <b>AGAGAATCATTATCA</b>   |
| <i>ywjA</i>                | <b>TGAGAAATATTATCA</b>   |
| <i>yhfQ</i>                | <b>TGATAATGATTCTCA</b>   |
| <i>yoaJ</i>                | <b>TGATAATGATTCTCA</b>   |
| <i>ywbL (efeU)</i>         | <b>TGATAATCATTTTCA</b>   |
| <i>yfmC (fecC)</i>         | <b>TGATAATGATTCTCA</b>   |
| <i>yfkM</i>                | <b>TTAGGCTAAGTATCA</b>   |
| <i>yclN (fpbN)</i>         | <b>TGATAATGATAATCA</b>   |
| <i>yfiZ</i>                | <b>TGAGAATAATCCTCA</b>   |
| <i>yusV1</i>               | <b>TGAAAATGATTTTCA</b>   |
| <i>yusV2</i>               | <b>TCGGAATCATTGCA</b>    |
| <i>yfhC</i>                | <b>TGATAATCATTTTCA</b>   |
| <i>pfeT1</i>               | <b>TGATAATTATTATCA</b>   |
| <i>pfeT2</i>               | <b>TGAAGATGATTTACG</b>   |

**Table S3)** List of Fur operator sites used to generate logo sequences. 23 Fur operator sites from Fur-regulated genes (numbers indicate the presence of multiple sites in a single regulatory region) were used to generate the sequence logo. The letters in bold represent the conserved signature bases that distinguish Fur operator sites from those regulated by PerR and Zur (2).

**Table S4)**

| <b>PerR regulated genes</b> | <b>OPERATOR SEQUENCE</b>         |
|-----------------------------|----------------------------------|
| <i>mrgA</i>                 | <b>TT</b> AATAATTATT <b>A</b> A  |
| <i>ahpC1</i>                | <b>TT</b> AGAATTATTAT <b>TG</b>  |
| <i>ahpC2</i>                | TA <b>A</b> AATTCATAT <b>A</b> T |
| <i>ahpC3</i>                | <b>A</b> TATATTAATT <b>A</b> TA  |
| <i>katA</i>                 | <b>TT</b> AATAAATT <b>A</b> A    |
| <i>fur</i>                  | <b>TT</b> AATAAATT <b>A</b> AG   |
| <i>perR1</i>                | <b>TT</b> ACACTAATT <b>A</b> A   |
| <i>perR2</i>                | <b>TT</b> AATAACATT <b>A</b> CA  |
| <i>hemAXCDBL1</i>           | <b>TT</b> AATAATTATT <b>A</b> A  |
| <i>hemAXCDBL2</i>           | <b>TT</b> AGAATGATT <b>A</b> A   |
| <i>pfeT</i>                 | <b>TT</b> AAAATAATT <b>A</b> A   |

**Table S4)** List of PerR operator sites used to generate logo sequences. 11 PerR operator sites from PerR-regulated genes (numbers indicate the presence of multiple sites in a single regulatory region) were used to generate the sequence logo. The letters in bold represent the conserved signature bases that distinguish PerR operator sites from those regulated by Fur and Zur (2).

# Figure S1)

## A) *pfeT* (*Bacillus subtilis*):

**GATAATGATwATCATTATC** **TTATAATNATTATAA**  
 ||||| ||| ||||| |||||  
 TGAATAAACATTAAT**TGATAATTATTATC**AAAAAGAAA**TTAAAAATAATTATAA**TTGAAATTCTCTTCGTGCG  
-10 +1 -35

TGCTATAATAAAGGA**A**GACATCAAGAAATAACTGACGATAAAAGCTGCCTTTTGGGCAGCGATTTTGTTTTT  
-10 +1

**GATAATGATwATCATTATC**  
 || ||||| || ||  
 ATAAGAGAAA**TGAAGATGATT**TACGTTCTCAATTAGAGAGGAGAATT**ATG**AATGAACAAGTTATCGT

## B) *frvA* (*Listeria monocytogenes*):

**GATAATGATAATCATTATCA**  
 ||| | | ||| |  
 GCTCAAGTGTTTTTTTGTGTATTAGACT**GATAGTGAATTTCAATTC**TCAATTAGAATATAATTTTATCAATT

**GATAATGATAATCATTATCA** **TTA**  
 ||||| | | |  
 AGTTTGATATGCCATTAGAAAAGTGC**TATAATGACAAGTGAGTTAAGGAT**GTATATCTTTATAGTTAT**TTA**

**TAATNATTATAA** -35 **GATAATGATAA**  
 ||| ||| | ||| ||  
**TAATAAT**TATT**G**TTTAATCTGTTTTTCGCGGTTGCGAAAGCAGATTTTTTGTGTTTTTTAGGG**TAA**TGGGAA  
-10 +1

**TCATTATCA**  
 ||||| |||  
**TCATTATCA**TTTGGAGAGGATGAGCATA**ATG**AAAGATTGGATGAAGCAGAATTGGCAATTTATTACGACAG

**Figure S1)** Full promoter sequences of *pfeT* and *frvA*.

- A) Sequence of the *B. subtilis pfeT* promoter showing the designated Fur and PerR boxes in bold and grey, respectively. Operator sites are aligned with the conserved 7-1-7 operator sites for these regulators. Fur boxes show the full, classical 19 bp sequence both in the sequence and for the conserved alignment sequence. The -35 and -10 regions are in italics and underlined. The transcriptional start site is in bold black.
- B) Complete sequence of the *L. monocytogenes frvA* promoter showing the designated Fur and PerR boxes boxes in bold and grey, respectively. Fur boxes show the full, classical 19 bp sequence both in the sequence and for the consensus. The -35 and -10 regions are in italics and underlined. The transcriptional start site is in bold.

# Figure S2)

IDENTITY: 335/620(54%) | E-VALUE: 0.0

|      |     |                                                                                                                                                                                                                                                                |     |
|------|-----|----------------------------------------------------------------------------------------------------------------------------------------------------------------------------------------------------------------------------------------------------------------|-----|
| PfeT | 22  | KNW-AQHAELIAALVSGALILAGWLLSGY--QVLSIILFLLAFVIGGFAKAKEGIEETLE                                                                                                                                                                                                   | 78  |
| FrvA | 2   | K+W Q+ + I +SG LI+ G L+ + I+FL AFVIGGF +AKEGI+ T++<br>KDWMKQNWQFITTTGISGILIVIGCLVGSVDVGFWTAIIFLSAFVIGGFQAKEGIQATIK                                                                                                                                             | 61  |
| PfeT | 79  | SKTLNVELLMIFAAGSALIGYWAEGAILIFIFSLSGALETYTMNKSSRDLTSLMQLEPE                                                                                                                                                                                                    | 138 |
| FrvA | 62  | +K LNVELLMI AA G+++IGYW EGAILIFIFS+SGALETYT NKS R++T LM +PE<br>TKKLNVELLMILAATGASIIIGYWFEGAILIFIFSVSGALETYTTNKS KREITKLMAFQPE                                                                                                                                  | 121 |
| PfeT | 139 | EA-TLMVNGETKRVVPVSDLQAGDMIVIKPGERVAADGIIESGSTSLDESALTGESMPVEK                                                                                                                                                                                                  | 197 |
| FrvA | 122 | A L+ NG+ + V +LQ DM+ ++PGE V DG+I GST+L+E+A+ GES+P K<br>RAFRLLSNGDLEEVAAKELQLDDMVFVRPGESVPIDGVIVRGSTTLNEAAINGESVPATK                                                                                                                                           | 181 |
| PfeT | 198 | NTGDTVFTGTVNRNGSLTVRVTKANEDSLFRKIIKLVESAQNSVSPAQAFIERFENAYVK                                                                                                                                                                                                   | 257 |
| FrvA | 182 | G VF GTVN + ++TV+VT+ E+++F KII+LVE+AQ+ S FIERFE+ YVK<br>TVGADVFGGTVNSSAITVKVTQTFENTIFS KIIRLVETAQSEPSKTARFIERFEDVYVK                                                                                                                                           | 241 |
| PfeT | 258 | GVLIAVALLLFVPHFALGWSWSETFYRAMVFMVVA <span style="background-color: black; color: white;">SPCALVASIM</span> PAALSLSISNGARNGM                                                                                                                                    | 317 |
| FrvA | 242 | VL+ V +++F+PHFALGWSW+ETFYRAMV + VASPCALVAS+ PA L+ ISNGAR+G+<br>AVLLFVLVMMFLPHFALGWSWNETFYRAMVLLTVA <span style="background-color: black; color: white;">SPCALVASVT</span> EAATLAAISNGARHGI                                                                     | 301 |
| PfeT | 318 | LVKGSVFLEQLGVSQMIAF <span style="background-color: black; color: white;">DKTGT</span> VTKGPVAVETIRIAEGFSEAEVLEAVYAIETQSSHP                                                                                                                                     | 377 |
| FrvA | 302 | L KG V LE L V+ IAFDKTGT+T G PA+ AE + V+ V A+E QS HP<br>LFKGGVHLENLRGVKAI <span style="background-color: black; color: white;">AFDKTGT</span> LTNGTPALTDRLFAENVDKQLVINVVGAMERQSLHP                                                                              | 361 |
| PfeT | 378 | LAQAITAYAESRGNVQSGYISIEETS <sup>g</sup> SGFGVMAEVS <sup>g</sup> GAKWKVKGAGFIGEEMAAQFMKQTA                                                                                                                                                                      | 437 |
| FrvA | 362 | LA AIT E + I + + G+GV A W+VGKAGF+G+E AA F<br>LAAAITQDLEPEITEKLTEIEVTDVPGWGVQAIYREGNWQVGKAGFVGKEAAAAFSNGAF                                                                                                                                                      | 421 |
| PfeT | 438 | SDVIQSGHTIVFVKDDQIAGCIALKDQIRPEAKEVMEELNRLGIKTAMLTGDHEDTAQA                                                                                                                                                                                                    | 497 |
| FrvA | 422 | + G TIV+V KD I ALKD RPEA ++ L GIKT M+TGD+E T A<br>ERLASEGKTIVYVAKDGV IQAMFALKDTCRPEAIRTIKALQAKGIKTIMVTGDNEQTGAA                                                                                                                                                | 481 |
| PfeT | 498 | IAKEAGMTTVVAECLPDQKVNEIKRLKEEFGTIAMVGDGINDAPALKAADVGIAMGGGTD                                                                                                                                                                                                   | 557 |
| FrvA | 482 | I E GM VV+ CLP++KV+ ++ L +G++AMVGDGINDAPAL A VGIAMG GTD<br>IQAELGMDYVVS <sup>g</sup> GCLPEKKVDVLR <sup>g</sup> ELSVTYGSVAMVGDGINDAPALAHAAVGIAMGEGTD                                                                                                            | 541 |
| PfeT | 558 | VALETADMVLMKNDLKKLVNMCRLSRKMNRIK <span style="background-color: orange; color: black;">QNI</span> IVFSLAVICLLICANFLQAMELPFG                                                                                                                                    | 617 |
| FrvA | 542 | +A+ETAD+VLMKNDL+K+ LS +++ I <span style="background-color: orange; color: black;">QNI</span> F++AVI +LI AN Q + LPFG<br>IAMETADVLMKNDLEKIPYAYTLSE <sup>g</sup> RLHWITW <span style="background-color: orange; color: black;">QNIC</span> FAIAVILVLTANVFQLINLPFG | 601 |
| PfeT | 618 | VIG <span style="background-color: blue; color: black;">HEGS</span> TILVILNGLRLLK                                                                                                                                                                              | 637 |
| FrvA | 602 | V+G <span style="background-color: blue; color: black;">HEGS</span> TILVILNGLRLL+<br>VVG <span style="background-color: blue; color: black;">HEGS</span> TILVILNGLRLLR                                                                                         | 621 |

**Figure S2)** Protein sequence identity between PfeT and FrvA. BLAST alignment was used to illustrate protein sequence identity between *B. subtilis* PfeT and *L. monocytogenes* FrvA. H6, H7 and H8 conserved transmembrane segments characteristic of P<sub>1B4</sub>-ATPases (5) are highlighted by black, orange and blue boxes, respectively.

## References:

1. Fuangthong M, Herbig AF, Bsat N, Helmann JD. 2002. Regulation of the *Bacillus subtilis fur* and *perR* genes by PerR: not all members of the PerR regulon are peroxide inducible. *J Bacteriol* 184:3276-86.
2. Fuangthong M, Helmann JD. 2003. Recognition of DNA by three ferric uptake regulator (Fur) homologs in *Bacillus subtilis*. *J Bacteriol* 185:6348-57.
3. Slack FJ, Mueller JP, Sonenshein AL. 1993. Mutations that relieve nutritional repression of the *Bacillus subtilis* dipeptide permease operon. *J Bacteriol* 175:4605-14.
4. Koo BM, Kritikos G, Farelli JD, Todor H, Tong K, Kimsey H, Wapinski I, Galardini M, Cabal A, Peters JM, Hachmann AB, Rudner DZ, Allen KN, Typas A, Gross CA. 2017. Construction and Analysis of Two Genome-Scale Deletion Libraries for *Bacillus subtilis*. *Cell Syst* 4:291-305 e7.
5. Argüello JM. 2003. Identification of ion-selectivity determinants in heavy-metal transport P<sub>1B</sub>-type ATPases. *J Membr Biol* 195:93-108.
